# Supplementary material for: Ni Doped Co-MOF-74 Synergized with 2D Ti3C2Tx MXene as an Efficient Electrocatalyst for Overall Water-Splitting
Source: MDPI journal article supplement (doi:10.3390/catal14030184), 2024-03-07
Supplement: s1 [file s1]

# Ni doped Co-MOF-74 synergized with 2D $\text{Ti}_3\text{C}_2\text{T}_x$ MXene as an efficient electrocatalyst for overall water-splitting

Ke Yu, Jingyuan Zhang, Yuting Hu, Lanqi Wang, Xiaofeng Zhang, Bin Zhao\*

School of Materials & Chemistry, University of Shanghai for Science and Technology, Shanghai 200093, China

\* Correspondence: zhaobin@usst.edu.cn

## Supporting information

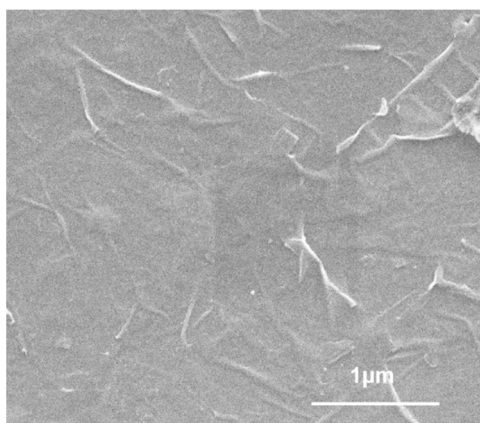

Figure S1. SEM image of as-prepared few-layer  $\text{Ti}_3\text{C}_2\text{T}_x$  MXene.

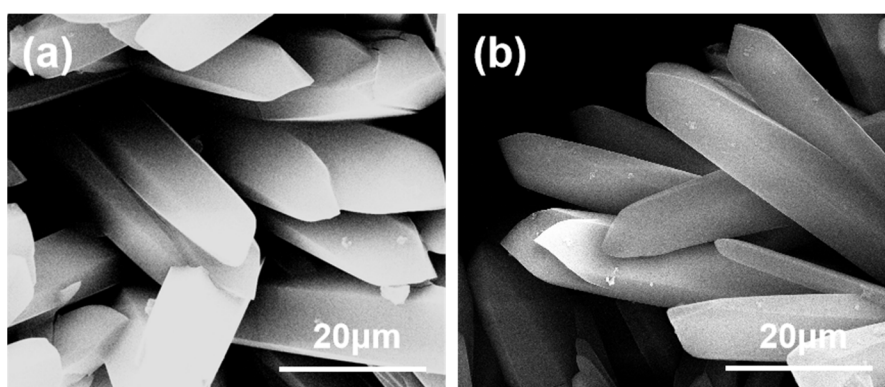

Figure S2. SEM images of a)  $\text{CoNi}_{0.1}$ -MOF-74/MXene/NF, b)  $\text{CoNi}_{0.03}$ -MOF-74/MXene/NF.

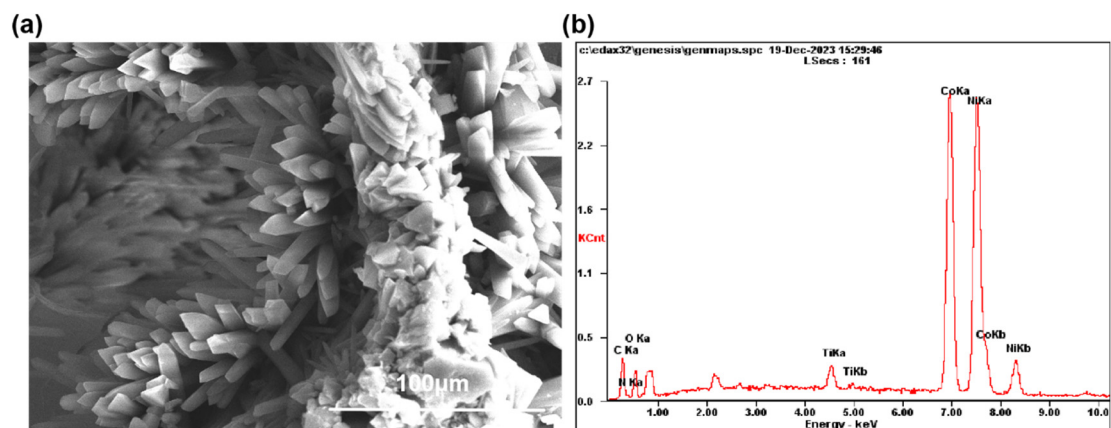

Figure S3. The SEM (a) and corresponding EDS spectra (b) of CoNi<sub>0.04</sub>-MOF-74/MXene.

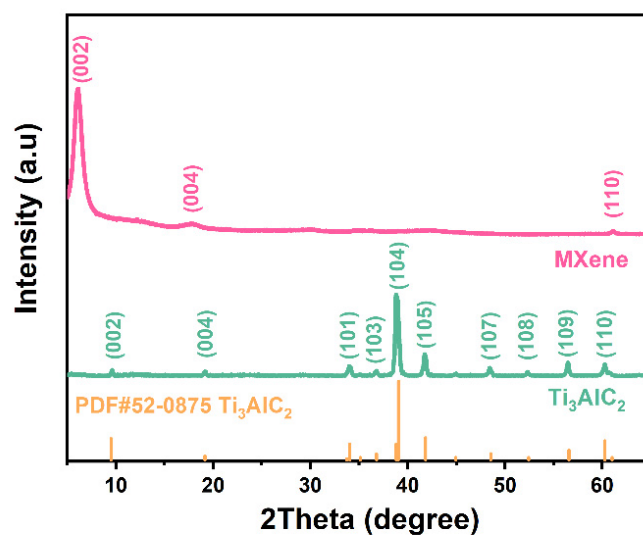

Figure S4. XRD patterns of MXene and Ti<sub>3</sub>AlC<sub>2</sub>

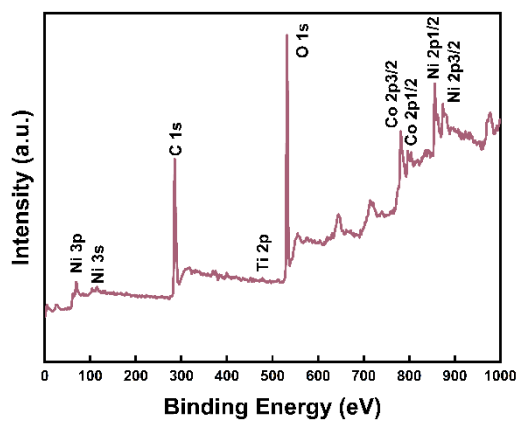

Figure S5. XPS survey spectra of CoNi<sub>0.04</sub>-MOF-74/MXene/NF.

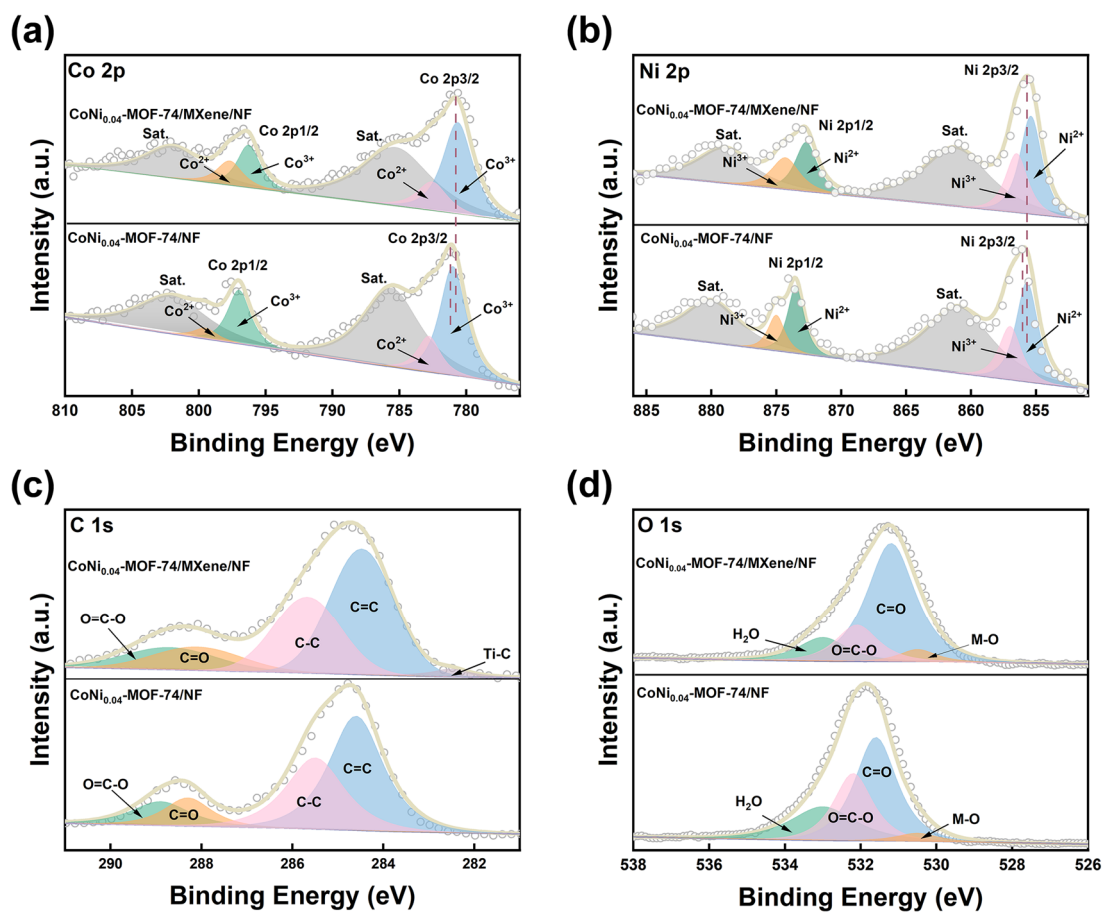

**Figure S6.** XPS (a) Co 2p, (b) Ni 2p, (c) C 1s, and (d) O 1s spectra of the CoNi<sub>0.04</sub>-MOF-74/MXene/NF and CoNi<sub>0.04</sub>-MOF-74/NF.

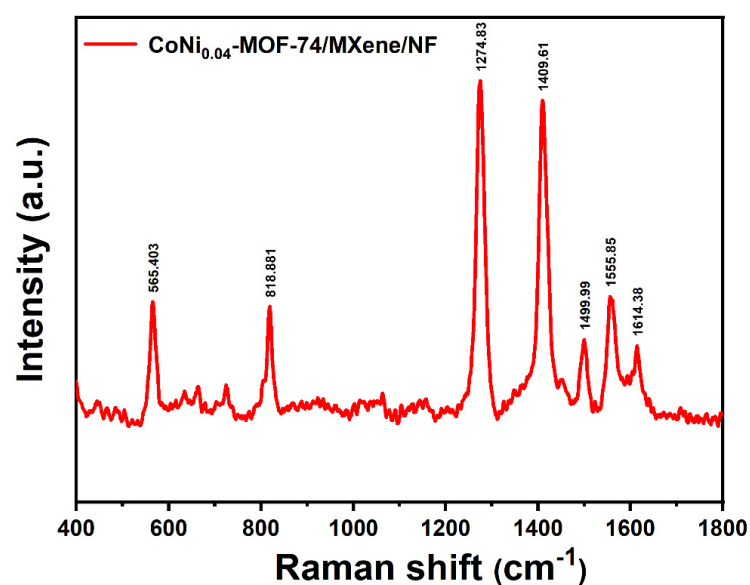

Figure S7. Raman spectra of CoNi<sub>0.04</sub>-MOF-74/MXene/NF

The TOF value was calculated based on the following equation:

$$\text{TOF} = JA / (4Fm)$$

in which TOF is based on the number of redox-active sites,  $J$  is the current density at a specific overpotential,  $A$  is the area of the electrode,  $F$  is the Faraday constant, and  $m$  is the number of active sites.

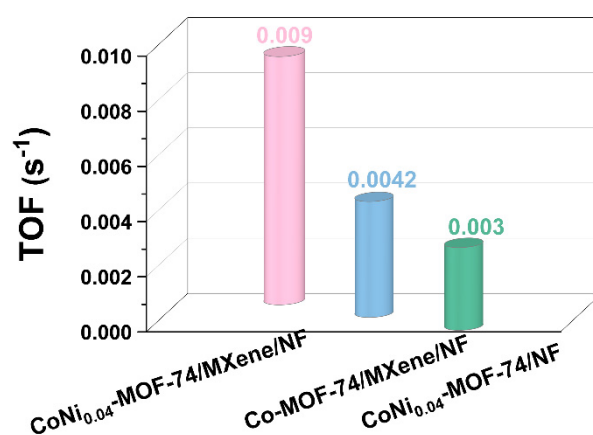

Figure S8. TOF of the CoNi<sub>0.04</sub>-MOF-74/MXene/NF, Co-MOF-74/MXene/NF and CoNi<sub>0.04</sub>-MOF-74/NF for OER.

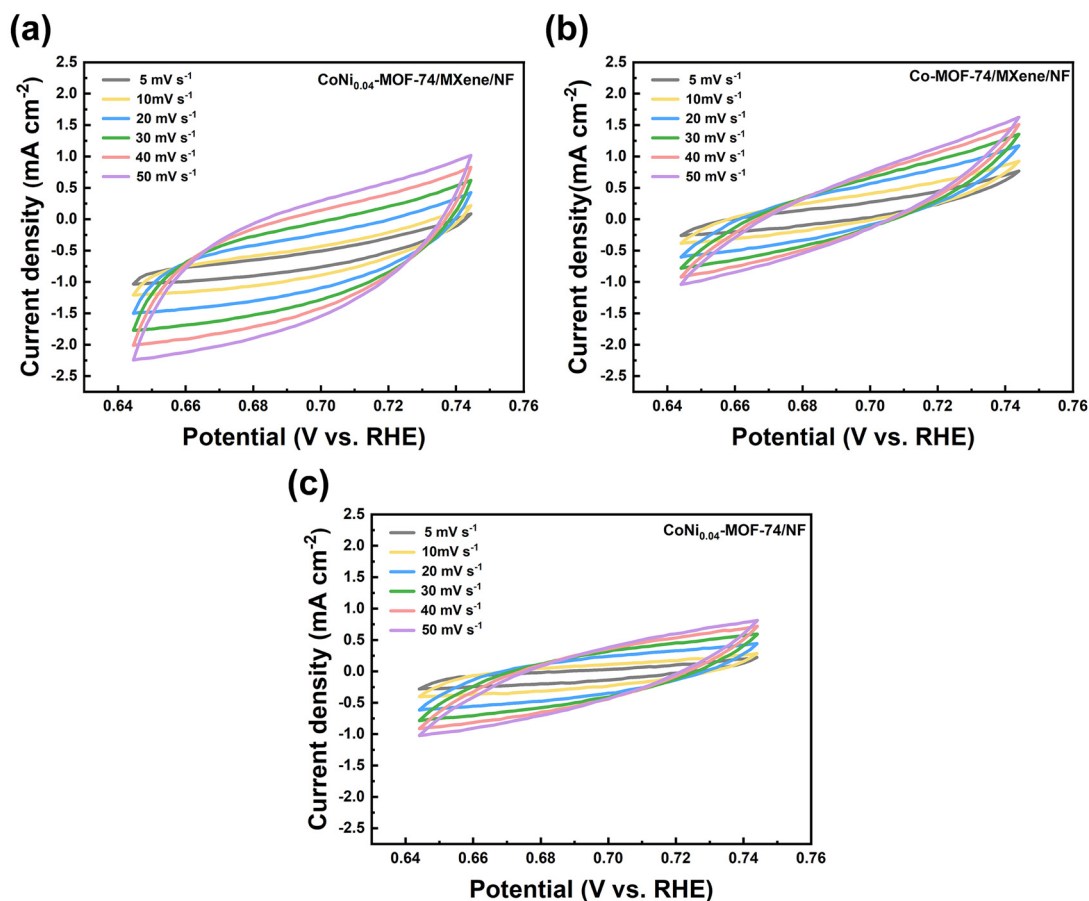

**Figure S9.** CV curves of the CoNi<sub>0.04</sub>-MOF-74/MXene/NF (a), Co-MOF-74/MXene/NF (b), CoNi<sub>0.04</sub>-MOF-74/NF (c) under different scan rates in the region of 0.644 - 0.744 V vs. RHE for OER process.

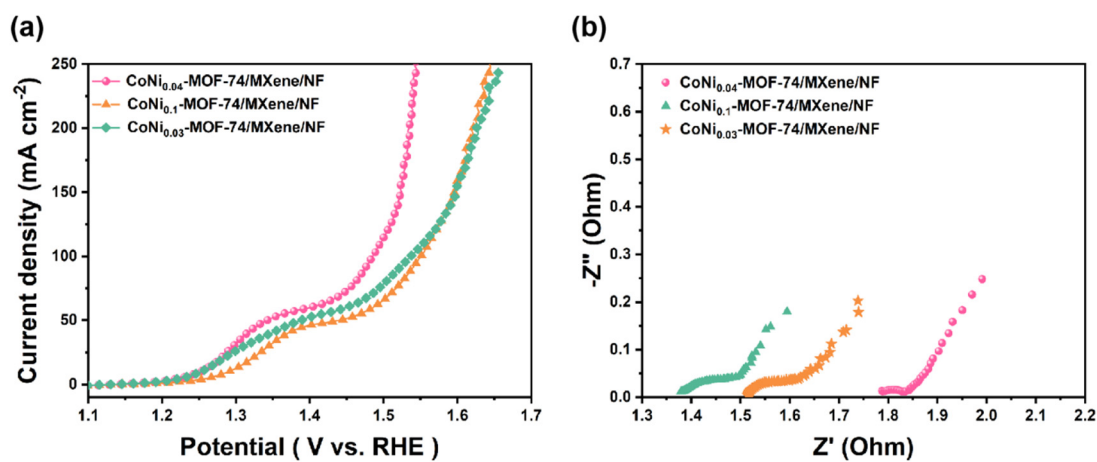

**Figure S10.** (a) OER polarization curves and (b) Nyquist plots of CoNi<sub>0.1</sub>-MOF-74/MXene/NF, CoNi<sub>0.04</sub>-MOF-74/MXene/NF, CoNi<sub>0.03</sub>-MOF-74/MXene/NF.

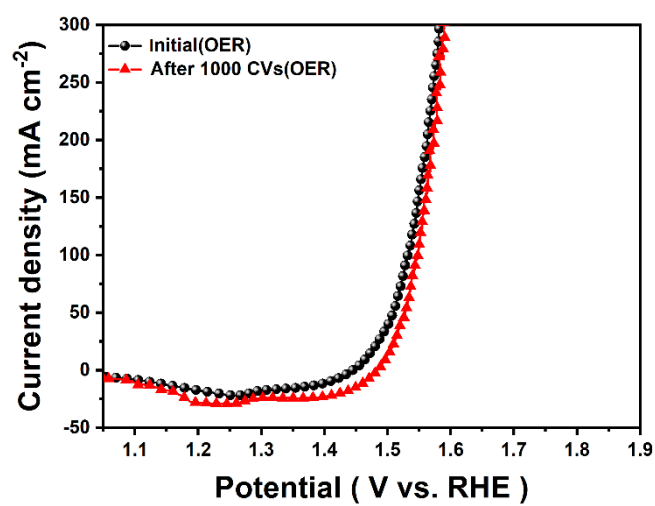

Figure S11. OER polarization curves for CoNi<sub>0.04</sub>-MOF-74/MXene/NF before and after 1,000 cycles.

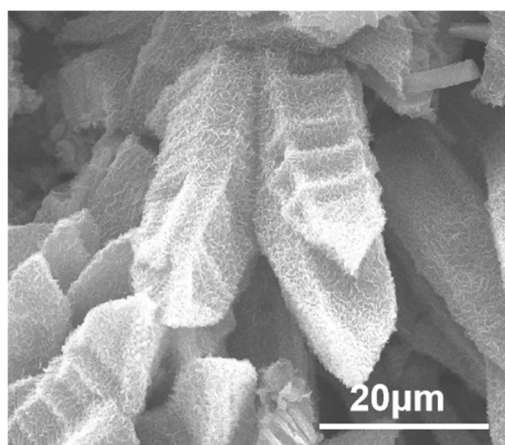

Figure S12. SEM images of CoNi<sub>0.04</sub>-MOF-74/MXene/NF after OER test.

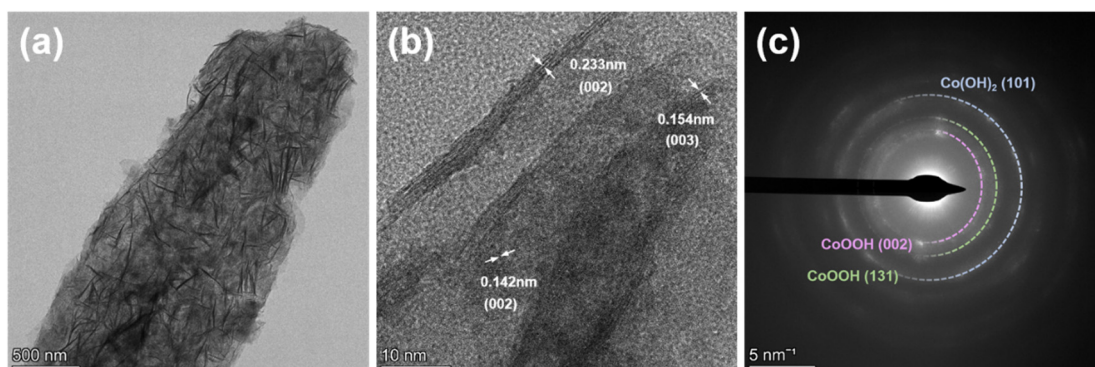

**Figure S13.** TEM images of (a)  $\text{CoNi}_{0.04}\text{-MOF-74/MXene/NF}$  after the OER test; HRTEM image (b) and SAED patterns (c) of  $\text{CoNi}_{0.04}\text{-MOF-74/MXene/NF}$  after the OER test.

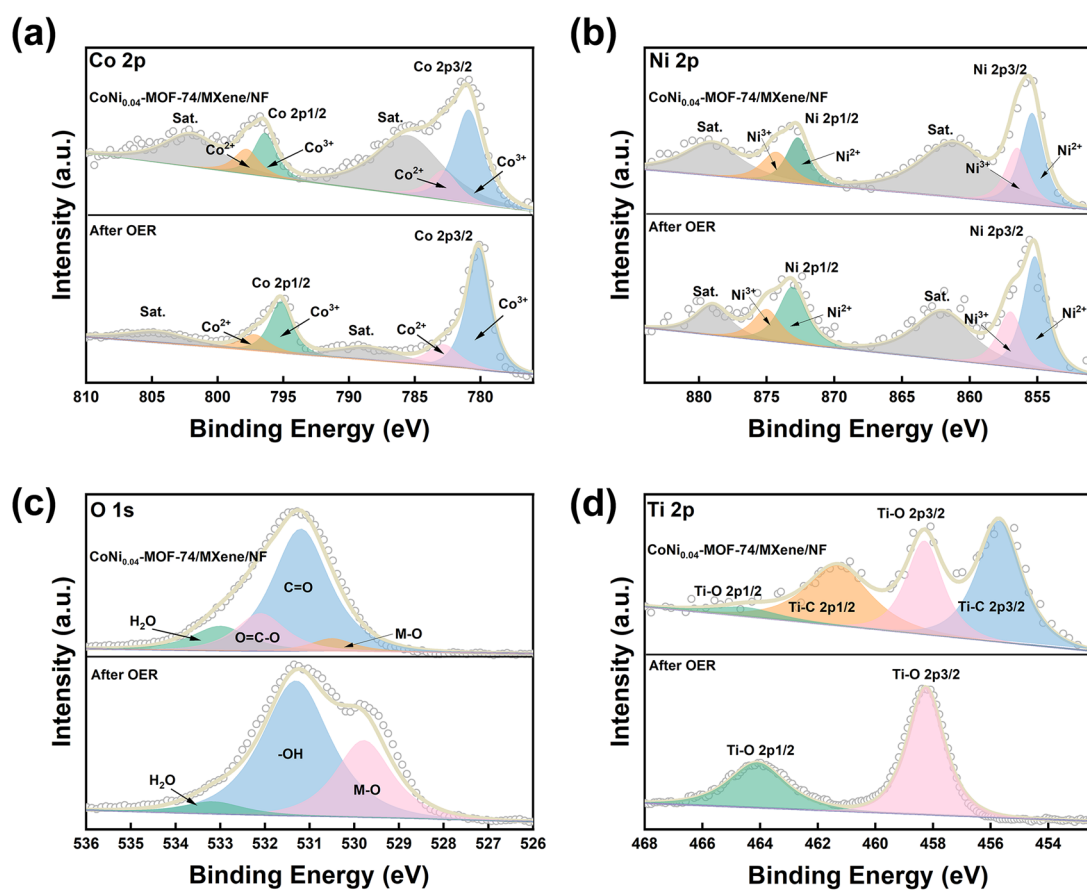

**Figure S14.** XPS (a) Co 2p, (b) Ni 2p, (c) O 1s, and (d) Ti 2p spectra of the CoNi<sub>0.04</sub>-MOF-74/MXene/NF and XPS spectra of CoNi<sub>0.04</sub>-MOF-74 /MXene/NF after the OER test.



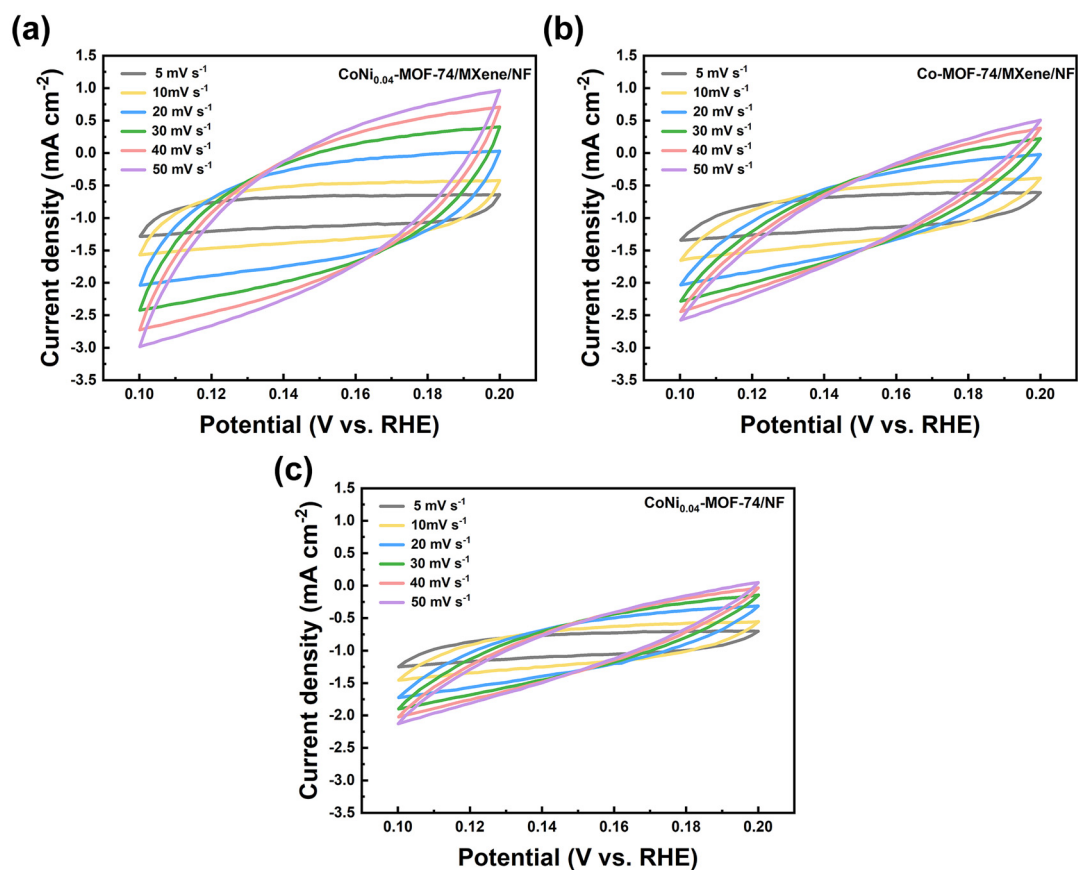

**Figure S15.** CV curves of the CoNi<sub>0.04</sub>-MOF-74/MXene/NF (a), Co-MOF-74/MXene/NF (b), CoNi<sub>0.04</sub>-MOF-

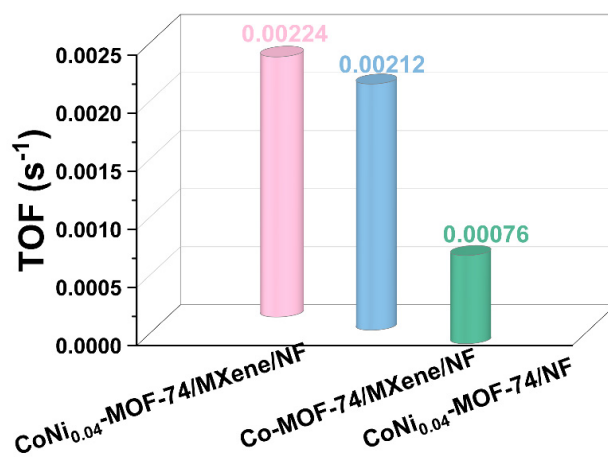

74/NF (c) under different scan rates in the region of 0.1 - 0.2 V vs. RHE for HER process.

**Figure S16.** TOF of the CoNi<sub>0.04</sub>-MOF-74/MXene/NF, Co-MOF-74/MXene/NF and CoNi<sub>0.04</sub>-MOF-74/NF for HER.

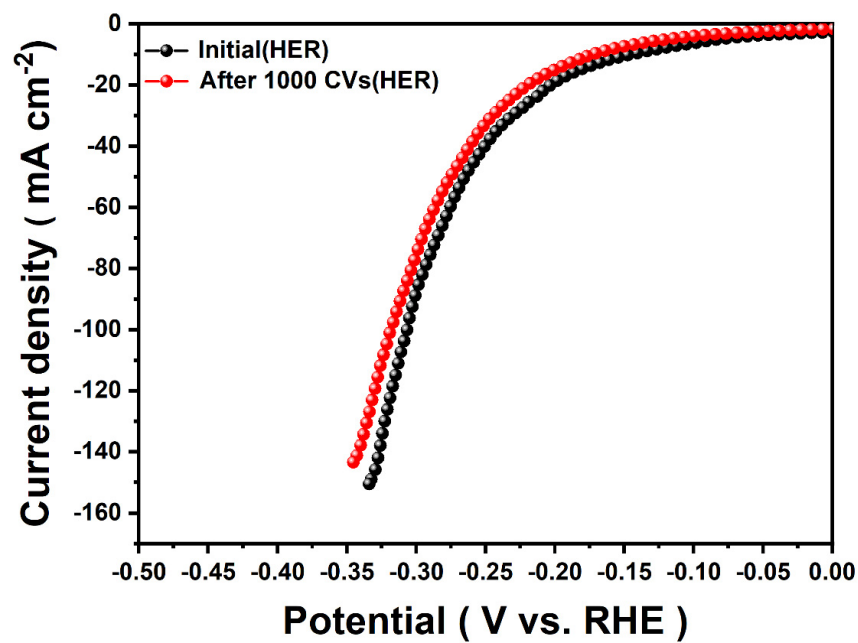

**Figure S17.** HER polarization curves for CoNi<sub>0.04</sub>-MOF-74/MXene/NF before and after 1,000 cycles.

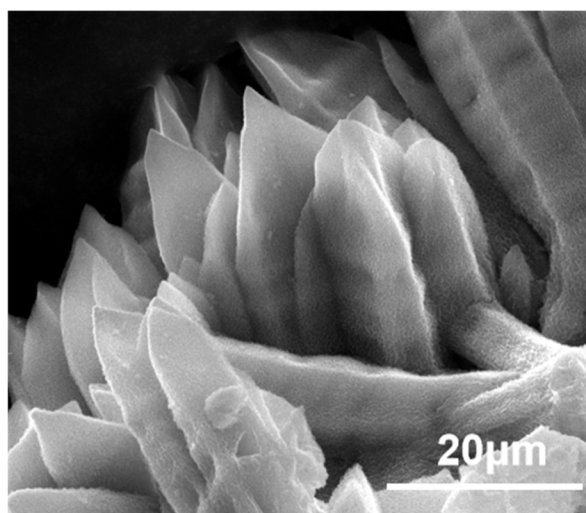

**Figure S18.** SEM images of CoNi<sub>0.04</sub>-MOF-74/MXene/NF after HER test.

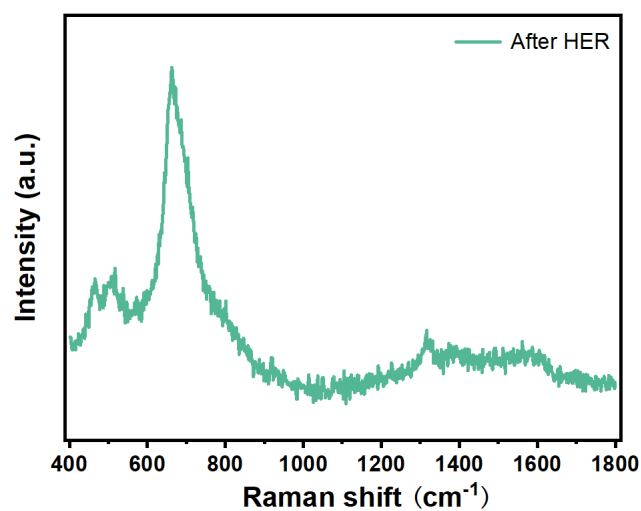

**Figure S19.** Raman spectra of CoNi<sub>0.04</sub>-MOF-74/MXene/NF after the HER test.

**Table S1.** Co2p peak area ratio of CoNi<sub>0.04</sub>-MOF-74/MXene/NF and Co-MOF-74/MXene/NF calculated from XPS spectra.

|                  | CoNi <sub>0.04</sub> -MOF-74/MXene/NF | Co-MOF-74/MXene/NF |
|------------------|---------------------------------------|--------------------|
| Co <sup>2+</sup> | 12.7%                                 | 19.9%              |
| Co <sup>3+</sup> | 31.7%                                 | 28.7%              |

**Table S2.** Comparison of Electrochemical performances of OER of CoNi<sub>0.04</sub>-MOF-74/MXene/NF with recently reported OER electrocatalysts in 1 M KOH.

| Materials                                                  | Overpotential<br>(mV) | Tafel slope<br>(mV dec <sup>-1</sup> ) | References |
|------------------------------------------------------------|-----------------------|----------------------------------------|------------|
| CoNi <sub>0.04</sub> -MOF-74/MXene/NF                      | 256(η100)             | 46.7                                   | Our Work   |
| Co <sub>2</sub> Ni-MOF@MX-1                                | 265(η10)              | 51.7                                   | [1]        |
| Ti <sub>2</sub> NT <sub>x</sub> @MOF-CoP                   | 241(η50)              | 65.8                                   | [2]        |
| MX@MOF-Co <sub>2</sub> P                                   | 246(η10)              | 39.29                                  | [3]        |
| Ti <sub>3</sub> C <sub>2</sub> @mNiCoP                     | 237(η10)              | 104                                    | [4]        |
| Ni <sub>0.7</sub> Fe <sub>0.3</sub> PS <sub>3</sub> @MXene | 282(η10)              | 36.5                                   | [5]        |
| Mo-NiCoP@MXene/NF                                          | 280(η10)              | 56.91                                  | [6]        |
| Ru@NiCo-MOF HPNs                                           | 284(η10)              | 78.8                                   | [7]        |
| CoNi MOF-CNTs                                              | 306 (η10)             | 42                                     | [8]        |

**Table S3.** OER catalyst EIS fitting parameters.

| Materials                          | R <sub>s</sub> (Ω) | R <sub>ct</sub> (Ω) | CPE(Ω) |
|------------------------------------|--------------------|---------------------|--------|
| CoNi <sub>0.04</sub> -MOF-74/MXene | 1.77               | 0.109               | 0.53   |
| Co-MOF-74/MXene                    | 1.48               | 0.37                | 0.56   |
| CoNi <sub>0.04</sub> -MOF-74/NF    | 1.669              | 1.38                | 0.51   |
| MXene/NF                           | 1.738              | 58.61               | 0.72   |

**Table S4.** Area ratios of Co2p and Ni2p peaks calculated from XPS spectra for CoNi<sub>0.04</sub>-MOF-74/MXene/NF and after OER testing.

|                  | CoNi <sub>0.04</sub> -MOF-74/MXene/NF | After OER |
|------------------|---------------------------------------|-----------|
| Co <sup>2+</sup> | 12.7%                                 | 16.9%     |
| Co <sup>3+</sup> | 31.7%                                 | 61.2%     |
| Ni <sup>2+</sup> | 28.5%                                 | 40.7%     |
| Ni <sup>3+</sup> | 9.7%                                  | 22.0%     |

**Table S5.** HER catalyst EIS fitting parameters.

| Materials                          | R <sub>s</sub> (Ω) | R <sub>ct</sub> (Ω) | CPE(Ω) |
|------------------------------------|--------------------|---------------------|--------|
| CoNi <sub>0.04</sub> -MOF-74/MXene | 1.687              | 8.518               | 0.72   |
| Co-MOF-74/MXene                    | 2.299              | 12.2                | 0.69   |
| CoNi <sub>0.04</sub> -MOF-74/NF    | 1.619              | 33.69               | 0.72   |
| MXene/NF                           | 1.662              | 72.43               | 0.74   |

**Table S6.** Comparison of Electrochemical performances of OWS of CoNi<sub>0.04</sub>-MOF-74/MXene/NF with recently reported OWS electrocatalysts in 1 M KOH.

| Catalyst                                       | Cell voltage [V] at 10 mA cm <sup>-2</sup> | References |
|------------------------------------------------|--------------------------------------------|------------|
| CoNi <sub>0.04</sub> -MOF-74/MXene/NF          | 1.49                                       | Our Work   |
| Ti <sub>2</sub> NT <sub>x</sub> @MOF-CoP       | 1.61                                       | [2]        |
| CdFe-BDC                                       | 1.64                                       | [9]        |
| CoNiBDC/CC                                     | 1.625                                      | [10]       |
| Ni-ZIF/Ni-B@NF                                 | 1.54                                       | [11]       |
| Fe <sub>2</sub> Ni-MIL-88B/NFF                 | 1.56                                       | [12]       |
| NiFe-MOF-74                                    | 1.58                                       | [13]       |
| NiFe-MOF                                       | 1.57                                       | [14]       |
| FeMn <sub>6</sub> Ce <sub>0.5</sub> -MOF-74/NF | 1.65                                       | [15]       |

## References

1. Tan, P.; Gao, R.; Zhang, Y.; Han, N.; Jiang, Y.; Xu, M.; Bao, S.-J.; Zhang, X. Electrostatically directed assembly of two-dimensional ultrathin Co<sub>2</sub>Ni-MOF/Ti<sub>3</sub>C<sub>2</sub>T<sub>x</sub> nanosheets for electrocatalytic oxygen evolution. *J. Colloid Interface Sci.* 2023, 630, 363–371. <https://doi.org/https://doi.org/10.1016/j.jcis.2022.10.109>
2. Zong, H.; Qi, R.; Yu, K.; Zhu, Z. Ultrathin Ti<sub>2</sub>NT<sub>x</sub> MXene-wrapped MOF-derived CoP frameworks towards hydrogen evolution and water oxidation. *Electrochim. Acta* 2021, 393, 139068. <https://doi.org/https://doi.org/10.1016/j.electacta.2021.139068>
3. Li, J.; Chen, C.; Lv, Z.; Ma, W.; Wang, M.; Li, Q.; Dang, J. Constructing heterostructures of ZIF-67 derived C, N doped Co<sub>2</sub>P and Ti<sub>2</sub>VC<sub>2</sub>T<sub>x</sub> MXene for enhanced OER. *J. Mater. Sci. Technol.* 2023, 145, 74–82. <https://doi.org/https://doi.org/10.1016/j.jmst.2022.10.048>
4. Yue, Q.; Sun, J.; Chen, S.; Zhou, Y.; Li, H.; Chen, Y.; Zhang, R.; Wei, G.; Kang, Y. Hierarchical Mesoporous MXene–NiCoP Electrocatalyst for Water-Splitting. *ACS Appl. Mater. Interfaces* 2020, 12, 18570–18577. <https://doi.org/10.1021/acsami.0c01303>
5. Du, C.-F.; Dinh, K.N.; Liang, Q.; Zheng, Y.; Luo, Y.; Zhang, J.; Yan, Q. Self-Assemble and In Situ Formation of Ni<sub>1-x</sub>Fe<sub>x</sub>PS<sub>3</sub> Nanomosaic-Decorated MXene Hybrids for Overall Water Splitting. *Adv. Energy Mater.* 2018, 8, 1801127. <https://doi.org/https://doi.org/10.1002/aenm.201801127>
6. Jiang, J.; Sun, R.; Huang, X.; Xu, W.; Zhou, S.; Wei, Y.; Han, S.; Li, Y. In-situ derived Mo-doped NiCoP and MXene to form Mott-Schottky heterojunction with tunable surface electron density to promote overall water splitting. *Compos. Part B Eng.* 2023, 263, 110834. <https://doi.org/https://doi.org/10.1016/j.compositesb.2023.110834>
7. Liu, D.; Xu, H.; Wang, C.; Shang, H.; Yu, R.; Wang, Y.; Li, J.; Li, X.; Du, Y. 3D Porous Ru-Doped NiCo-MOF Hollow Nanospheres for Boosting Oxygen Evolution Reaction Electrocatalysis. *Inorg. Chem.* 2021, 60, 5882–5889. <https://doi.org/10.1021/acs.inorgchem.1c00295>
8. Yu, S.; Wu, Y.; Xue, Q.; Zhu, J.-J.; Zhou, Y. A novel multi-walled carbon nanotube-coupled CoNi MOF composite enhances the oxygen evolution reaction through synergistic effects. *J. Mater. Chem. A* 2022, 10, 4936–4943. <https://doi.org/10.1039/D1TA10681C>
9. Luo, Y.; Yang, X.; He, L.; Zheng, Y.; Pang, J.; Wang, L.; Jiang, R.; Hou, J.; Guo, X.; Chen, L. Structural and Electronic Modulation of Iron-Based Bimetallic Metal–Organic Framework Bifunctional Electrocatalysts for Efficient Overall Water Splitting in Alkaline and Seawater Environment, *ACS Appl. Mater. Interfaces* 2022, 14, 46374–46385. <https://doi.org/10.1021/acsami.2c05181>
10. Bai, X.-J.; Chen, H.; Li, Y.-N.; Shao, L.; Ma, J.-C.; Li, L.-L.; Chen, J.-Y.; Wang, T.-Q.; Zhang, X.-M.; Zhang, L.-Y.; et al. CoNi-based metal–organic framework nanoarrays supported on carbon cloth as bifunctional electrocatalysts for efficient water-splitting. *New J. Chem.* 2020, 44, 1694–1698. <https://doi.org/10.1039/C9NJ06204A>
11. Xu, H.; Fei, B.; Cai, G.; Ha, Y.; Liu, J.; Jia, H.; Zhang, J.; Liu, M.; Wu, R. Boronization-Induced Ultrathin 2D Nanosheets with Abundant Crystalline–Amorphous Phase Boundary Supported on Nickel Foam toward Efficient Water Splitting. *Adv. Energy Mater.* 2020, 10, 1902714. <https://doi.org/https://doi.org/10.1002/aenm.201902714>
12. Raja, D.S.; Chuah, X.-F.; Lu, S.-Y. In Situ Grown Bimetallic MOF-Based Composite as Highly Efficient Bifunctional Electrocatalyst for Overall Water Splitting with Ultrastability at High Current Densities. *Adv. Energy Mater.* 2018, 8, 1801065. <https://doi.org/https://doi.org/10.1002/aenm.201801065>
13. Chen, C.; Suo, N.; Han, X.; He, X.; Dou, Z.; Lin, Z.; Cui, L. Tuning the morphology and electron structure of metal-organic framework-74 as bifunctional electrocatalyst for OER and HER using bimetallic collaboration strategy. *J. Alloys Compd.* 2021, 865, 158795. <https://doi.org/https://doi.org/10.1016/j.jallcom.2021.158795>
14. Mou, Q.; Xu, Z.; Wang, G.; Li, E.; Liu, J.; Zhao, P.; Liu, X.; Li, H.; Cheng, G. A bimetal hierarchical layer structure MOF grown on Ni foam as a bifunctional catalyst for the OER and HER. *Inorg. Chem. Front.* 2021, 8, 2889–2899. <https://doi.org/10.1039/D1QI00267H>
15. Chai, N.; Kong, Y.; Liu, T.; Ying, S.; Jiang, Q.; Yi, F.-Y. (FeMnCe)-co-doped MOF-74 with significantly improved performance for overall water splitting. *Dalton Trans.* 2023, 52, 11601–11610. <https://doi.org/10.1039/D3DT01892J>
